# Supplementary material for: Early Use of Luspatercept After Allogeneic HSCT Improves Erythroid Recovery and Transfusion Burden
Source: Research Square preprint supplement (doi:10.21203/rs.3.rs-7900872/v1), 2025-10-31
Supplement: Supplementary file 1 [file 33f2ffd6c7662401e092c896.xlsx]

## Sheet: Sheet1
Table 3. Common adverse events
AE, n (%)	luspatercept	Control	p value
	(n=49)	(n=47)
Asthenia	13(26.5)	11(23.4)	0.78
Diarrhea	11(22.4)	8(17.0)	0.763
Nausea	10(20.4)	7(14.9)	0.705
Back pain	3(6.1)	2(4.3)	0.816
Hypertension	1(2.0)	0(0.0)	0.491
