# Supplementary material for: Early Use of Luspatercept After Allogeneic HSCT Improves Erythroid Recovery and Transfusion Burden
Source: Research Square preprint supplement (doi:10.21203/rs.3.rs-7900872/v1), 2025-10-31
Supplement: Supplementary file 2 [file 70cee7051433cc8c0deb96a7.xlsx]

## Sheet: Sheet1
Table 2. Factors associated with response to luspatercept.
Variables	Response to luspatercept		p value
	Yes(n=45)	No(n=4)
Age, median (range), years	46(19-69)	46.5(42-54)	0.742
Gender, n (%)			0.241
Male	25(55.6)	1(25)
Female	20(44.4)	3(75)
ABO blood type, n (%)			0.99
Matched	24(53.3)	2(50.0)
Major mismatched	11(24.5)	1(25.0)
Minor mismatched	10(22.2)	1(25.0)
Donor source			0.553
MUD	7(15.6)	1(25.0)
MSD	10(22.2)	0(0.0)
HID	28(62.2)	3(75.0)
DSA			0.594
Negative	42(93.3)	4(100.0)
Positive	3(6.7)	0(0.0)
Number of CD34+ cells (×106 /kg); median (range)	9.01(3.84-28.9)	11.2(9.31-12)	0.086
Ratio of basophilic erythroblasts before luspatercept; median (range)	1(0-14.5)	1.25(0-3.5)	0.552
Ratio of polychromatic erythroblasts before luspatercept; median (range)	11(0-34.5)	15(5-21)	0.609
Ratio of orthochromatic erythroblasts before luspatercept; median (range)	14.5(0-56)	12.7(7.5-19.5)	0.985
Dose of treatment, median (range)	0.83(0.66-1.25)	0.99(0.8-1.09)	0.242
aGVHD, n (%)	9(20.0)	1(25.0)	0.812
CMV reactivation, n (%)	12(26.7)	2(50.0)	0.322
