# Supplementary material for: Early Use of Luspatercept After Allogeneic HSCT Improves Erythroid Recovery and Transfusion Burden
Source: Research Square preprint supplement (doi:10.21203/rs.3.rs-7900872/v1), 2025-10-31
Supplement: Supplementary file 3 [file a06a72f1eea59af87f6f40a3.xlsx]

## Sheet: Table 1
Table1. Demographic and disease characteristics of the patients at baseline.
Characteristic	Total	Control	Luspatercept	p-value
	(n=96)	(n=47)	(n=49)
Median age (range), years	44(18-69)	44(18-62)	46(19-69)	0.817
Gender, n (%)				0.752
Male	52(54.2)	26(56.3)	26(53.1)
Female	44(45.8)	21(43.7)	23(46.9)
Disease, n (%)				0.28
AML	47(49.0)	21(44.6)	26(53.1)
ALL	30(31.3)	19(40.4)	11(22.4)
MDS	15(15.6)	6(12.8)	9(18.5)
SAA	3(3.1)	1(2.1)	2(4.1)
MF	1(1.0)	0(0.0)	1(2.0)
Disease status				0.437
CR	62(64.6)	32(68.1)	30(61.2)
NR	34(35.4)	15(31.9)	19(38.8)
ABO blood type, n (%)				0.431
Matched	53(55.2)	27(57.4)	26(53.1)
Major mismatched	19(19.8)	7(14.9)	12(24.5)
Minor mismatched	24(25)	13(27.7)	11(22.4)
Donor source				0.569
MUD	16(16.7)	8(17.0)	8(16.3)
MSD	16(16.7)	6(12.8)	10(20.4)
HID	64(66.7)	33(70.2)	31(63.3)
DSA				0.442
Negative	88(91.7)	42(89.4)	46(93.9)
Positive	8(8.3)	5(10.6)	3(6.1)
Median CD34 cells, ×10^6/kg (range)	9.25(1.66-28.9)	8.99(1.66-17.30)	9.49(3.84-28.9)	0.642
Median neutrophil engraftment, day (range)	14(9-20)	14(10-18)	15(9-20)	0.481
Median platelet engraftment, day (range)	18(9-56)	17(9-34)	20(10-56)	0.052
Erythropoietin （mIU/mL）, median (range)	81.2(10.7-375)	78.2(8.56-368)	81.2(8.56-375)	0.891
